# Supplementary material for: The Effect of Sample Handling on Cross Sectional HIV Incidence Testing Results
Source: PubMed Central journal article supplement (PMC3202521; doi:10.1371/journal.pone.0025899), 2011-10-26

# Supplementary Figure S8.

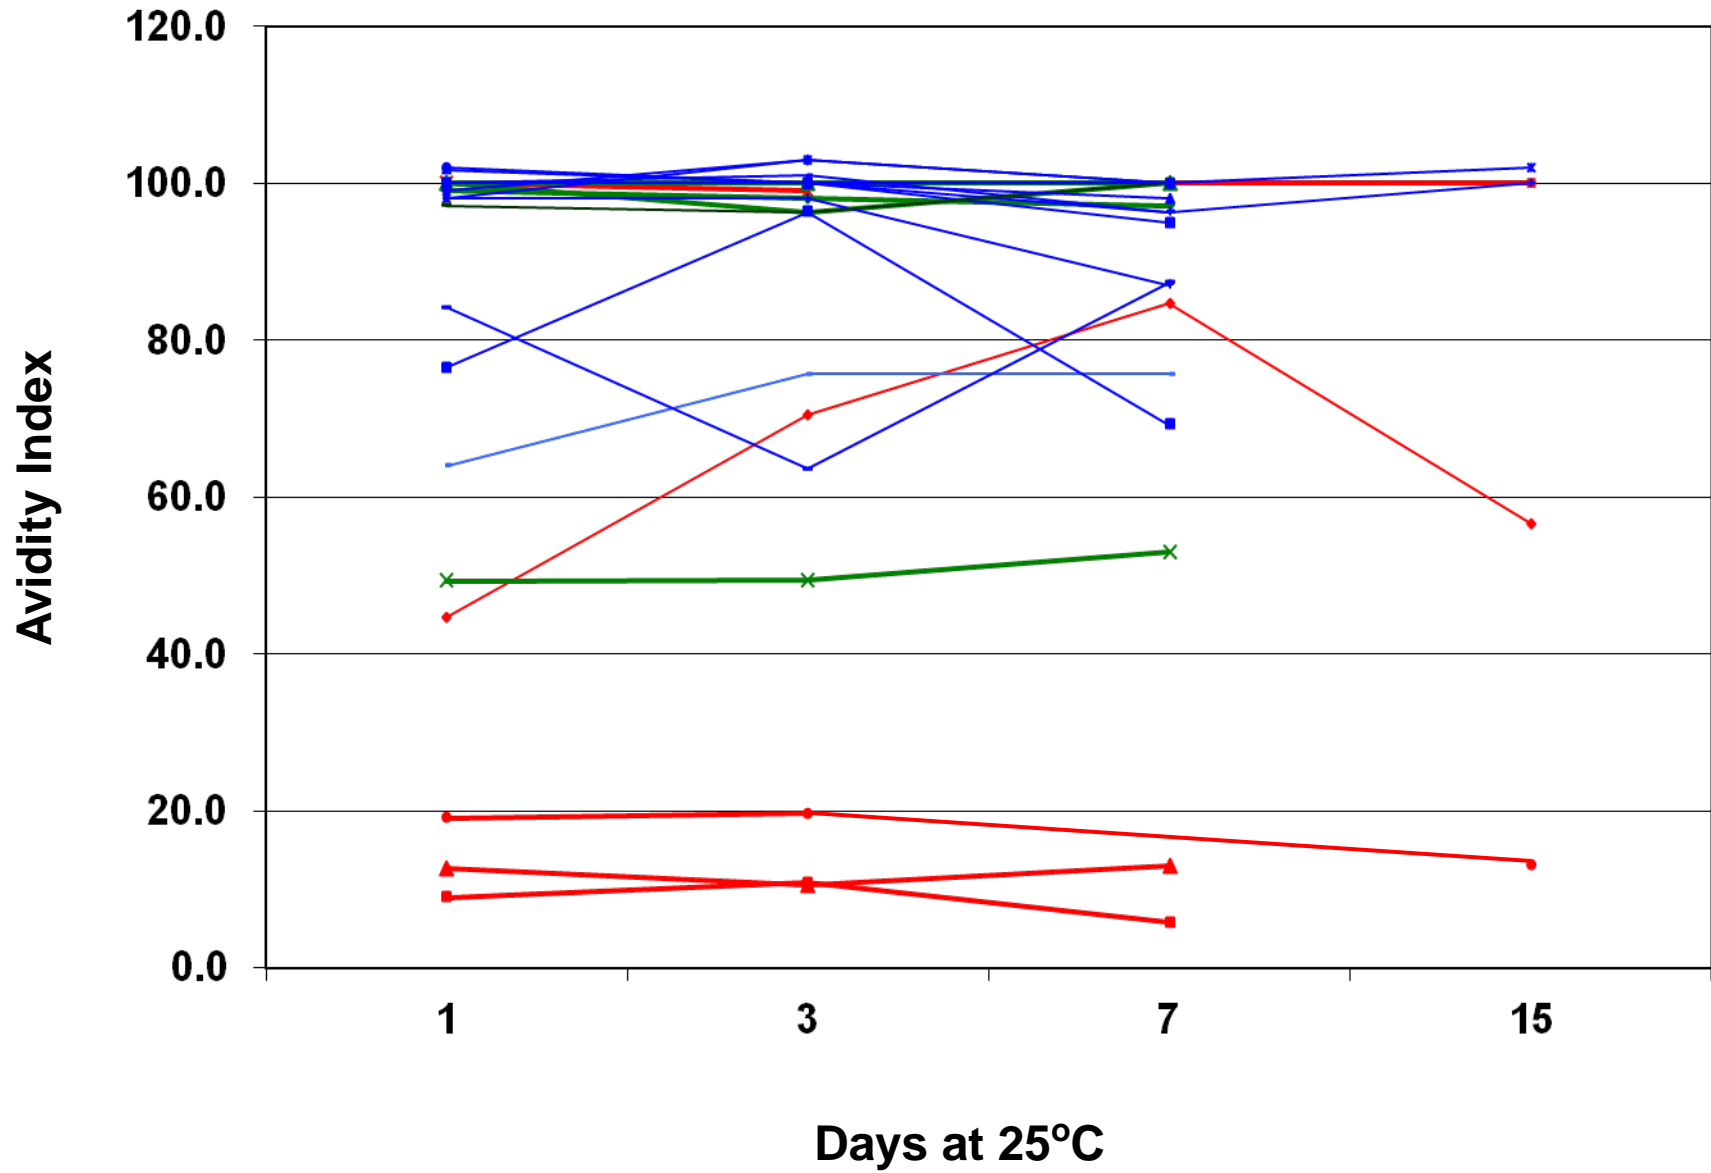

Supplement: pone.0025899.s008.pdf [file pone.0025899.s008.pdf]
