# Supplementary material for: The Effect of Sample Handling on Cross Sectional HIV Incidence Testing Results
Source: PLOS journal article supplement (doi:10.1371/journal.pone.0025899), 2011-10-26

**Supplementary Figure S7.**

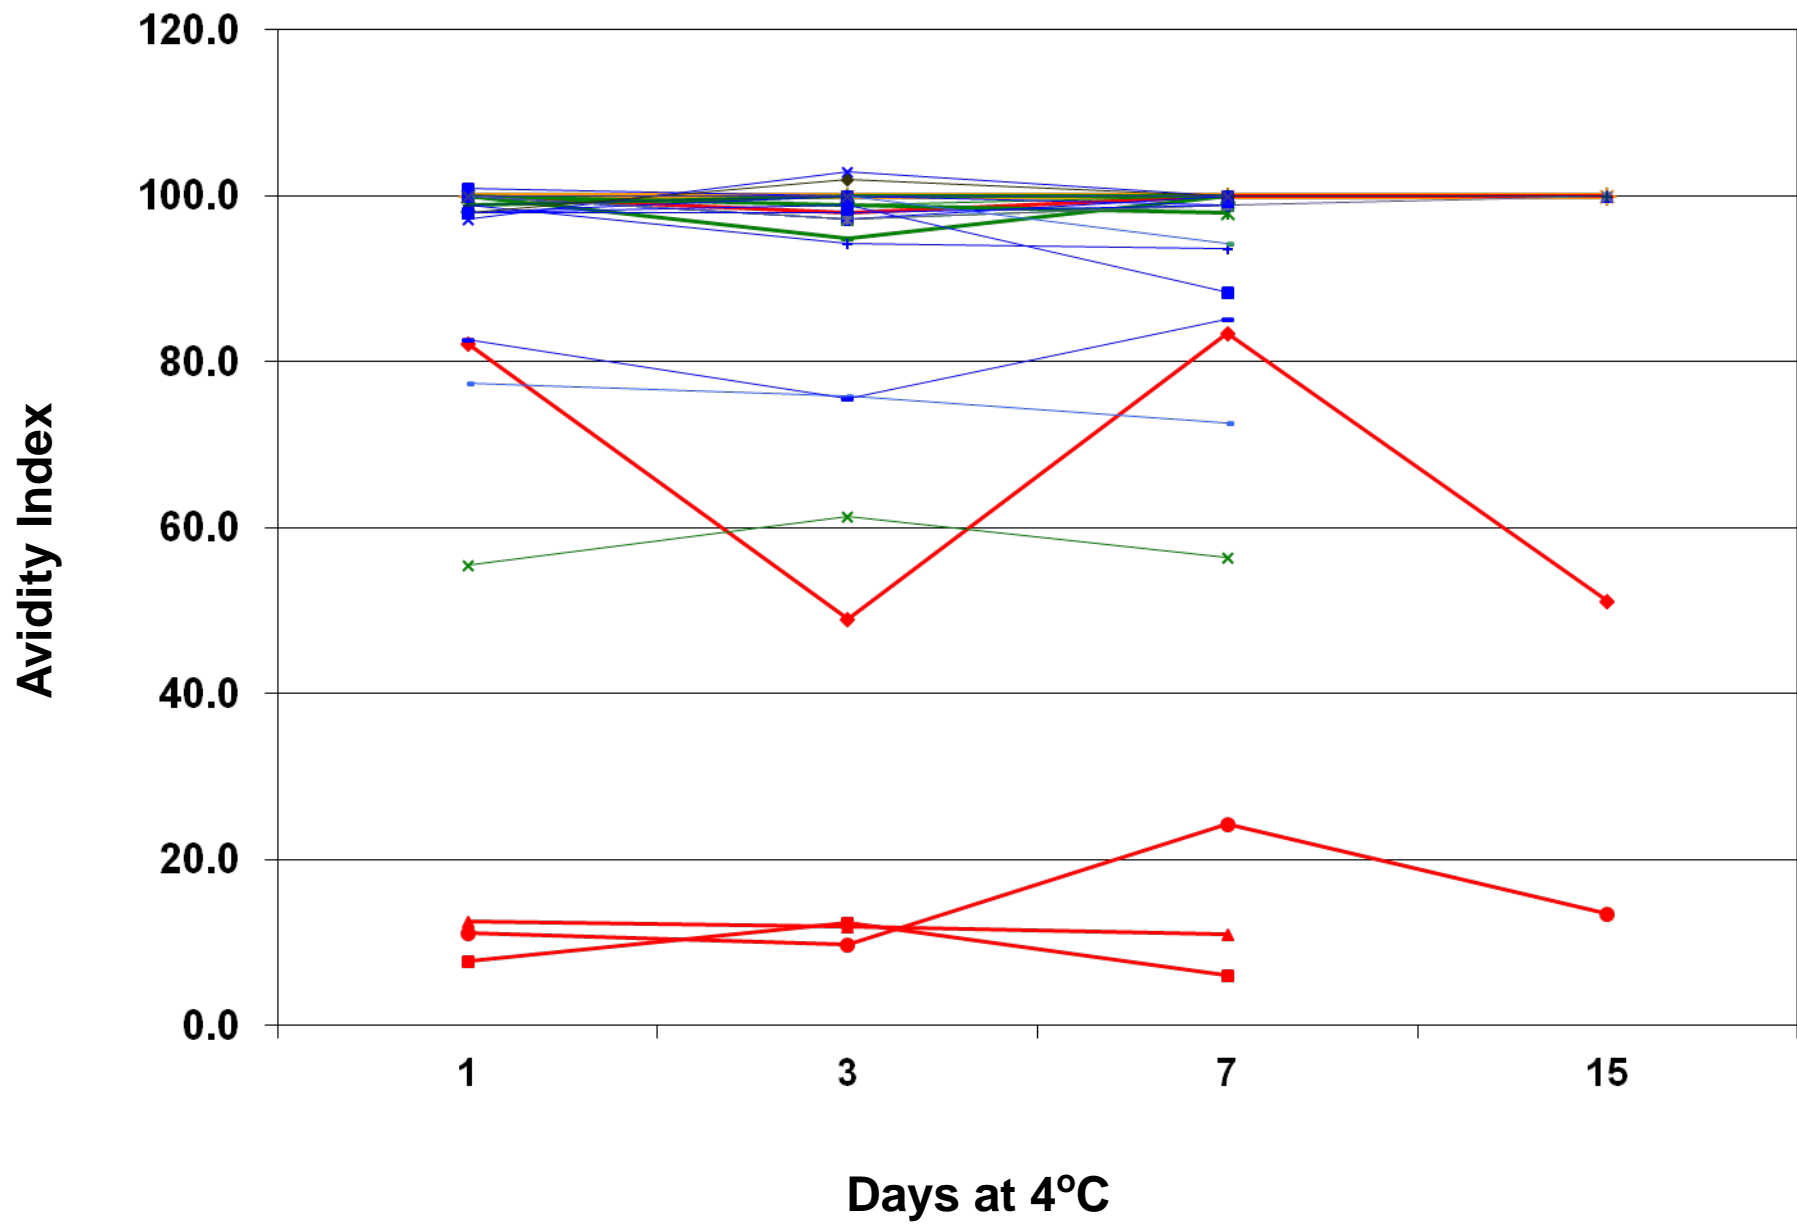

Supplement: S7 (10.1371/journal.pone.0025899.s007) [file journal.pone.0025899.s007]
